# Supplementary material
Source: PubMed Central journal article supplement (PMC9756787)
Supplement: mmc1.pdf [file mmc1.pdf]

# Media usage predicts intention to be vaccinated against SARS-CoV-2 in the US and the UK

## Supplementary materials

Daniel Allington, Siobhan McAndrew, Vivienne Moxham-Hall, Bobby Duffy

### Rank-order correlation matrix: Study 1 (US Sample I)

|                    | 1    | 2    | 3    | 4    | 5    | 6    | 7    | 8    | 9    | 10   |
|--------------------|------|------|------|------|------|------|------|------|------|------|
| 1 Age              |      | -.01 | -.19 | -.05 | .00  | -.27 | .15  | .41  | .51  | .11  |
| 2 Female           | -.01 |      | .03  | -.06 | -.15 | .07  | -.06 | -.04 | -.12 | -.10 |
| 3 Other than white | -.19 | .03  |      | -.09 | -.15 | .09  | .00  | -.09 | -.27 | -.09 |
| 4 Education        | -.05 | -.06 | -.09 |      | .40  | .05  | .12  | .24  | .06  | .18  |
| 5 Income           | .00  | -.15 | -.15 | .40  |      | .00  | .09  | .20  | .18  | .12  |
| 6 Social Media     | -.27 | .07  | .09  | .05  | .00  |      | .21  | .01  | -.15 | .04  |
| 7 Legacy Media     | .15  | -.06 | .00  | .12  | .09  | .21  |      | .32  | .01  | .25  |
| 8 Vote: Main Left  | .41  | -.04 | -.09 | .24  | .20  | .01  | .32  |      |      | .29  |
| 9 Vote: Main Right | .51  | -.12 | -.27 | .06  | .18  | -.15 | .01  |      |      | -.05 |
| 10 Vaccine Int.    | .11  | -.10 | -.09 | .18  | .12  | .04  | .25  | .29  | -.05 |      |

### Rank-order correlation matrix: Study 2 (US Sample II)

|                    | 1    | 2    | 3    | 4    | 5    | 6    | 7    | 8    | 9    | 10   |
|--------------------|------|------|------|------|------|------|------|------|------|------|
| 1 Age              |      | .00  | -.24 | .02  | .05  | -.26 | .17  | .40  | .48  | .02  |
| 2 Female           | .00  |      | .02  | -.01 | -.11 | .05  | -.03 | .01  | -.10 | -.10 |
| 3 Other than white | -.24 | .02  |      | -.13 | -.18 | .07  | -.03 | -.11 | -.32 | -.09 |
| 4 Education        | .02  | -.01 | -.13 |      | .37  | .04  | .12  | .22  | .15  | .18  |
| 5 Income           | .05  | -.11 | -.18 | .37  |      | .01  | .09  | .18  | .24  | .14  |
| 6 Social Media     | -.26 | .05  | .07  | .04  | .01  |      | .27  | .01  | -.15 | .04  |
| 7 Legacy Media     | .17  | -.03 | -.03 | .12  | .09  | .27  |      | .30  | .05  | .25  |
| 8 Vote: Main Left  | .40  | .01  | -.11 | .22  | .18  | .01  | .30  |      |      | .22  |
| 9 Vote: Main Right | .48  | -.10 | -.32 | .15  | .24  | -.15 | .05  |      |      | -.10 |
| 10 Vaccine Int.    | .02  | -.10 | -.09 | .18  | .14  | .04  | .25  | .22  | -.10 |      |

### Rank-order correlation matrix: Study 3 (UK Sample I)

|                    | 1    | 2    | 3    | 4    | 5    | 6    | 7    | 8    | 9    |
|--------------------|------|------|------|------|------|------|------|------|------|
| 1 Age              |      | -.13 | -.12 | -.29 | -.30 | .13  | -.11 | .30  | .13  |
| 2 Female           | -.13 |      | .00  | .06  | .07  | -.07 | .01  | -.11 | -.02 |
| 3 Other than white | -.12 | .00  |      | .10  | .07  | .00  | .08  | -.07 | -.08 |
| 4 Education        | -.29 | .06  | .10  |      | .13  | .10  | .18  | -.15 | .08  |
| 5 Social Media     | -.30 | .07  | .07  | .13  |      | .18  | .12  | -.10 | .02  |
| 6 Legacy Media     | .13  | -.07 | .00  | .10  | .18  |      | .04  | .04  | .19  |
| 7 Vote: Main Left  | -.11 | .01  | .08  | .18  | .12  | .04  |      |      | .12  |
| 8 Vote: Main Right | .30  | -.11 | -.07 | -.15 | -.10 | .04  |      |      | .01  |
| 9 Vaccine Int.     | .13  | -.02 | -.08 | .08  | .02  | .19  | .12  | .01  |      |

## Rank-order correlation matrix: Study 4 (UK sample II)

|                     | 1    | 2    | 3    | 4    | 5    | 6    | 7    | 8    | 9    | 10   | 11   | 12   | 13   | 14   | 15   | 16   |
|---------------------|------|------|------|------|------|------|------|------|------|------|------|------|------|------|------|------|
| 1 Age               |      | -.03 | -.29 | -.08 | -.11 | .05  | -.07 | -.43 | -.34 | -.37 | -.43 | -.48 | -.02 | -.06 | .30  | .23  |
| 2 Female            | -.03 |      | -.01 | -.01 | -.09 | .01  | -.03 | -.11 | .05  | -.02 | -.05 | -.01 | -.02 | .01  | -.04 | -.05 |
| 3 Other than white  | -.29 | -.01 |      | .03  | -.03 | .00  | .13  | .26  | .14  | .28  | .20  | .26  | .08  | .11  | -.11 | -.15 |
| 4 Education         | -.08 | -.01 | .03  |      | .31  | -.01 | .14  | -.03 | -.04 | .03  | .05  | -.01 | .10  | .11  | -.06 | .04  |
| 5 Income            | -.11 | -.09 | -.03 | .31  |      | .03  | .14  | .01  | -.02 | .07  | .08  | .02  | .12  | .03  | .08  | .06  |
| 6 TV/Radio          | .05  | .01  | .00  | -.01 | .03  |      | .22  | -.03 | .04  | .06  | -.01 | .00  | .68  | .02  | .08  | .13  |
| 7 News/Mag.         | -.07 | -.03 | .13  | .14  | .14  | .22  |      | .21  | .20  | .26  | .22  | .25  | .85  | .09  | .03  | .03  |
| 8 YouTube           | -.43 | -.11 | .26  | -.03 | .01  | -.03 | .21  |      | .53  | .59  | .56  | .80  | .14  | .04  | -.13 | -.15 |
| 9 Facebook          | -.34 | .05  | .14  | -.04 | -.02 | .04  | .20  | .53  |      | .55  | .47  | .82  | .17  | .03  | -.09 | -.14 |
| 10 WhatsApp         | -.37 | -.02 | .28  | .03  | .07  | .06  | .26  | .59  | .55  |      | .55  | .75  | .22  | .10  | -.06 | -.10 |
| 11 Twitter          | -.43 | -.05 | .20  | .05  | .08  | -.01 | .22  | .56  | .47  | .55  |      | .76  | .16  | .15  | -.10 | -.09 |
| 12 Social Media     | -.48 | -.01 | .26  | -.01 | .02  | .00  | .25  | .80  | .82  | .75  | .76  |      | .19  | .09  | -.14 | -.17 |
| 13 Legacy Media     | -.02 | -.02 | .08  | .10  | .12  | .68  | .85  | .14  | .17  | .22  | .16  | .19  |      | .07  | .06  | .09  |
| 14 Vote: Main Left  | -.06 | .01  | .11  | .11  | .03  | .02  | .09  | .04  | .03  | .10  | .15  | .09  | .07  |      |      | .04  |
| 15 Vote: Main Right | .30  | -.04 | -.11 | -.06 | .08  | .08  | .03  | -.13 | -.09 | -.06 | -.10 | -.14 | .06  |      |      | .09  |
| 16 Vaccine Int.     | .23  | -.05 | -.15 | .04  | .06  | .13  | .03  | -.15 | -.14 | -.10 | -.09 | -.17 | .09  | .04  |      | .09  |
